# Supplementary material for: ProRefiner: an entropy-based refining strategy for inverse protein folding with global graph attention
Source: PubMed Central journal article supplement (PMC10654420; doi:10.1038/s41467-023-43166-6), 2023-11-16
Supplement: 41467_2023_43166_MOESM3_ESM.pdf [file 41467_2023_43166_MOESM3_ESM.pdf]

## Reporting Summary

Nature Portfolio wishes to improve the reproducibility of the work that we publish. This form provides structure for consistency and transparency in reporting. For further information on Nature Portfolio policies, see our [Editorial Policies](#) and the [Editorial Policy Checklist](#).

### Statistics

For all statistical analyses, confirm that the following items are present in the figure legend, table legend, main text, or Methods section.

n/a Confirmed

- The exact sample size ( $n$ ) for each experimental group/condition, given as a discrete number and unit of measurement
- A statement on whether measurements were taken from distinct samples or whether the same sample was measured repeatedly
- The statistical test(s) used AND whether they are one- or two-sided  
*Only common tests should be described solely by name; describe more complex techniques in the Methods section.*
- A description of all covariates tested
- A description of any assumptions or corrections, such as tests of normality and adjustment for multiple comparisons
- A full description of the statistical parameters including central tendency (e.g. means) or other basic estimates (e.g. regression coefficient) AND variation (e.g. standard deviation) or associated estimates of uncertainty (e.g. confidence intervals)
- For null hypothesis testing, the test statistic (e.g.  $F$ ,  $t$ ,  $r$ ) with confidence intervals, effect sizes, degrees of freedom and  $P$  value noted  
*Give  $P$  values as exact values whenever suitable.*
- For Bayesian analysis, information on the choice of priors and Markov chain Monte Carlo settings
- For hierarchical and complex designs, identification of the appropriate level for tests and full reporting of outcomes
- Estimates of effect sizes (e.g. Cohen's  $d$ , Pearson's  $r$ ), indicating how they were calculated

*Our web collection on [statistics for biologists](#) contains articles on many of the points above.*

### Software and code

Policy information about [availability of computer code](#)

**Data collection** For public datasets CATH (v4.2), TS50 (v2.0), EnzBench (from Rosetta v3.13), BR\_EnzBench, Ligand Binding Affinity dataset (v0.1) and Small Molecule Properties (v0.1) dataset we directly use the published data.  
For Latest PDB dataset, we use custom code to collect the PDB files from <https://www.rcsb.org/> and data processing used Biopython v1.80 (<https://biopython.org/>).

**Data analysis** TM-score and RMSD calculation used TM-score v20220415 from <https://zhanggroup.org/TM-score/>.  
Mantel test used mantel v2.2.0 from <https://github.com/jwcarr/mantel>.  
Other data analysis used Python v3.9.16 (<https://www.python.org/>), NumPy v1.24.3 (<https://numpy.org/>), SciPy v1.10.1 (<https://scipy.org/>), PyTorch v1.13.0 (<https://pytorch.org/>), pandas v2.0.2 (<https://pandas.pydata.org/>), Matplotlib v3.7.1 (<https://matplotlib.org/>), seaborn v0.12.2 (<https://seaborn.pydata.org/>) and Biopython v1.80 (<https://biopython.org/>).  
Structure visualizations were created in ChimeraX v1.6.1 (<https://www.cgl.ucsf.edu/chimera/x/>).  
Indel analysis used CRISPResso2 (<https://github.com/pinellolab/CRISPResso2>).  
The code developed in this manuscript is deposited in Colab ([https://colab.research.google.com/drive/1a6VW-BB0twEwL65sE\\_dUAM42wdSm6RZp?usp=sharing](https://colab.research.google.com/drive/1a6VW-BB0twEwL65sE_dUAM42wdSm6RZp?usp=sharing)), Code Ocean (<https://codeocean.com/capsule/9492154/tree>) and Github (<https://zenodo.org/records/10030882>).

For manuscripts utilizing custom algorithms or software that are central to the research but not yet described in published literature, software must be made available to editors and reviewers. We strongly encourage code deposition in a community repository (e.g. GitHub). See the Nature Portfolio [guidelines for submitting code & software](#) for further information.

## Data

Policy information about [availability of data](#)

All manuscripts must include a [data availability statement](#). This statement should provide the following information, where applicable:

- Accession codes, unique identifiers, or web links for publicly available datasets
- A description of any restrictions on data availability
- For clinical datasets or third party data, please ensure that the statement adheres to our [policy](#)

CATH dataset (v4.2) is available at: <http://people.csail.mit.edu/ingraham/graph-protein-design/data/>.

TS50 dataset (v2.0) is available at: <https://zenodo.org/record/6650679#.ZDJJNhVByhY>.

EnzBench is available as part of the standard Rosetta package (v3.13) which could be downloaded from <https://www.rosettacommons.org/software/license-and-download> with a license.

BR\_EnzBench is provided by and available from the paper <https://doi.org/10.1371/journal.pcbi.1005600>.

Latest PDB dataset is available at [https://drive.google.com/file/d/1Ate5I0Hz5GwzOJN4sQL\\_RrDUKjxMJZ0u/view?usp=sharing](https://drive.google.com/file/d/1Ate5I0Hz5GwzOJN4sQL_RrDUKjxMJZ0u/view?usp=sharing).

Ligand Binding Affinity dataset (v0.1) is available at <https://zenodo.org/record/4914718>.

Small Molecule Properties dataset (v0.1) is available at <https://zenodo.org/record/4911142>.

Source data are provided with this paper and through Figshare (<https://doi.org/10.6084/m9.figshare.23913147>).

## Research involving human participants, their data, or biological material

Policy information about studies with [human participants or human data](#). See also policy information about [sex, gender \(identity/presentation\), and sexual orientation](#) and [race, ethnicity and racism](#).

Reporting on sex and gender

Reporting on race, ethnicity, or other socially relevant groupings

Population characteristics

Recruitment

Ethics oversight

Note that full information on the approval of the study protocol must also be provided in the manuscript.

## Field-specific reporting

Please select the one below that is the best fit for your research. If you are not sure, read the appropriate sections before making your selection.

Life sciences  Behavioural & social sciences  Ecological, evolutionary & environmental sciences

For a reference copy of the document with all sections, see [nature.com/documents/nr-reporting-summary-flat.pdf](https://nature.com/documents/nr-reporting-summary-flat.pdf)

## Life sciences study design

All studies must disclose on these points even when the disclosure is negative.

Sample size

Data exclusions

Replication

Randomization

Blinding

## Reporting for specific materials, systems and methods

We require information from authors about some types of materials, experimental systems and methods used in many studies. Here, indicate whether each material, system or method listed is relevant to your study. If you are not sure if a list item applies to your research, read the appropriate section before selecting a response.

## Materials & experimental systems

## Methods

- | n/a                                 | Involvement                                               |
|-------------------------------------|-----------------------------------------------------------|
| <input checked="" type="checkbox"/> | <input type="checkbox"/> Antibodies                       |
| <input type="checkbox"/>            | <input checked="" type="checkbox"/> Eukaryotic cell lines |
| <input checked="" type="checkbox"/> | <input type="checkbox"/> Palaeontology and archaeology    |
| <input checked="" type="checkbox"/> | <input type="checkbox"/> Animals and other organisms      |
| <input checked="" type="checkbox"/> | <input type="checkbox"/> Clinical data                    |
| <input checked="" type="checkbox"/> | <input type="checkbox"/> Dual use research of concern     |
| <input checked="" type="checkbox"/> | <input type="checkbox"/> Plants                           |

- | n/a                                 | Involvement                                     |
|-------------------------------------|-------------------------------------------------|
| <input checked="" type="checkbox"/> | <input type="checkbox"/> ChIP-seq               |
| <input checked="" type="checkbox"/> | <input type="checkbox"/> Flow cytometry         |
| <input checked="" type="checkbox"/> | <input type="checkbox"/> MRI-based neuroimaging |

## Eukaryotic cell lines

Policy information about [cell lines and Sex and Gender in Research](#)

- |                                                                      |                                                                                                                       |
|----------------------------------------------------------------------|-----------------------------------------------------------------------------------------------------------------------|
| Cell line source(s)                                                  | 293T cells have been purchased from ATCC.                                                                             |
| Authentication                                                       | 293T cells have been authenticated by lighth microscopy but not by additional methods.                                |
| Mycoplasma contamination                                             | 293T cells were tested monthly for mycoplasma contamination and all cell lines were tested negative for mycoplasma.   |
| Commonly misidentified lines<br>(See <a href="#">ICLAC</a> register) | No cell lines used in this paper are listed in the database of commonly misidentified cell lines maintained by ICLAC. |
